# Supplementary material for: An estimate of global glacier volume
Source: Copernicus journal article supplement (doi:10.5194/tc-7-141-2013), 2013-01-30
Supplement: Supplementary file 1 [file tc-7-141-2013-supplement.zip]

Key to Source Numbers

|      |                           |      |                           |
|------|---------------------------|------|---------------------------|
| 0001 | Driedger and Kennard 1986 | 0002 | Hodge 1979                |
| 0003 | Jacobel 1995              | 0004 | Macheret et al. 1988      |
| 0005 | Zhuravlev 1981            | 0006 | Zhuravlev 1985            |
| 0007 | Björnsson 1981            | 0008 | Nikitin et al. 2000a      |
| 0009 | Su et al. 1984            | 0010 | Navarro et al. 2005       |
| 0011 | Nikitin et al. 2000b      | 0012 | Navarro et al. 2009       |
| 0013 | Pattyn et al. 2009        | 0014 | Binder et al. 2009        |
| 0015 | Ekman 1971                | 0016 | Glazovskij et al. 1991    |
| 0017 | Dowdeswell et al. 1986    | 0018 | Gergan et al. 1999        |
| 0019 | Björnsson 1986            | 0020 | Aric and Brückl 2001      |
| 0021 | Thyssen and Kohnen 1968   | 0022 | Förtsch and Vidal 1958    |
| 0023 | Förtsch et al. 1955       | 0024 | Förtsch 1958              |
| 0025 | Förtsch and Vidal 1956    | 0026 | Förtsch and Vidal 1957    |
| 0027 | Giese 1963                | 0028 | Brockamp 1958             |
| 0029 | Cherkasov 1965            | 0030 | Brown et al. 2010         |
| 0031 | Prinz et al. 2011         | 0032 | Fischer 2009              |
| 0033 | Brown et al. 1986         | 0034 | Bælum and Benn 2011       |
| 0035 | Dowdeswell et al. 2002    | 0036 | Dowdeswell et al. 2004    |
| 0037 | Rippin et al. 2003        | 0038 | Span et al. 2005          |
| 0039 | Hyndman 1965              | 0040 | Paterson and Koerner 1974 |
| 0041 | Macheret et al. 1999      | 0042 | Fischer et al. 2007       |
| 0043 | Wu et al. 2011            | 0044 | Ma et al. 2008            |
| 0045 | Wang and Pu 2009          | 0046 | Ma et al. 2010            |

# **Bibliography — Measurements of Glacier Area, Thickness and Volume (January 2012)**

- Aric, K., and E. Brückl, 2001, Eisdickenmessungen auf Gletschern der Ostalpen, in Hammerl, C., W. Lenhardt, R. Steinacker and P. Steinhaus, eds., *Zentralanstalt für Meteorologie und Geodynamik 1851-2001: 150 Jahre Meteorologie in Österreich*, 768-780. HS0020
- Bælum, K., and D.I. Benn, 2011, Thermal structure and drainage system of a small valley glacier (Tellbreen, Svalbard), investigated by ground penetrating radar, *The Cryosphere*, **5**(1), 139-149. HS0034
- Binder, D., E. Brückl, K.H. Roch, M. Behm, W. Schöner and B. Hynek, 2009, Determination of total ice volume and ice-thickness distribution of two glaciers in the Hohe Tauern region, Eastern Alps, from GPR data, *Annals of Glaciology*, **50**(51), 71-79. HS0014
- Björnsson, H., 1981, Radio-echo sounding maps of Storglaciären, Isfallsglaciären and Rabots glaciär, northern Sweden, *Geografiska Annaler*, **63A**(3-4), 225-231. HS0007
- Björnsson, H., 1986, Surface and bedrock topography of ice caps in Iceland mapped by radio-echo sounding, *Annals of Glaciology*, **8**, 11-19. HS0018
- Brockamp, B., 1958, Reflektionsseismische Wiederholungsmessungen auf dem Pasterzen Gletscher und ihre Bedeutung für die Feststellung von Gletscher- und Inlandeisschwankungen, *International Association of Scientific Hydrology*, **48**, 509-513. HS0028
- Brown, J., J. Harper and N. Humphrey, 2010, Cirque glacier sensitivity to 21st century warming: Sperry Glacier, Rocky Mountains, USA, *Global and Planetary Change*, **74**(2), 91-98. HS0030
- Brown, C.S., L.A. Rasmussen and M.F. Meier, 1986, Bed topography inferred from airborne radio-echo sounding of Columbia Glacier, Alaska, *Professional Paper 1258-G*, U.S. Geological Survey, Reston, VA. 26p. HS0033
- Cherkasov, P.A., 1965, Seismicheskoe zondirovanie lednikov bassejna reki Aganakty Tentekskoj v khibe Dzhungarskij Alatau, *Glyatsiolog. Issled. v Kazakhstane*, **5**, 117-134. HS0029
- Dowdeswell, J.A., T.J. Benham, M.R. Gorman, D. Burgess and M.J. Sharp, 2004, Form and flow of the Devon Island Ice Cap, Canadian Arctic, *Journal of Geophysical Research*, **109**(F2), F02002, doi: 10.1029/2003JF000095. HS0036
- Dowdeswell, J.A., R.P. Bassford, M.R. Gorman, M. Williams, A.F. Glazovskij, Yu. Ya. Macheret, A.P. Shepherd, Y.V. Vasilenko, L.M. Savatyugin, H.-W. Hubberten, and H. Miller, 2002, Form and flow of the Academy of Sciences Ice Cap, Severnaya Zemlya, Russian High Arctic, *Journal of Geophysical Research*, **107**(B4), 2076, doi:10.1029/2000JB000129. HS0035
- Dowdeswell, J.A., D.J. Drewry, A.P.R. Cooper, M.R. Gorman, O. Liestøl and O. Orheim, 1986, Digital mapping of the Nordaustlandet ice caps from airborne geophysical investigations, *Annals of Glaciology*, **8**, 51-58. HS0017
- Driedger, C.L., and P.M. Kennard, 1986, Glacier volume estimation on Cascade volcanoes: an analysis and comparison with other methods, *Annals of Glaciology*, **8**, 59-64. HS0001
- Ekman, S.R., 1971, Seismic investigations on the Nordaustlandet ice caps, *Geografiska Annaler*, **53A**, 1-13. HS0015

- Fischer, A., 2009, Calculation of glacier volume from sparse ice-thickness data, applied to Schaufelferner, Austria, *Journal of Glaciology*, **55**(191), 453-460. HS0032
- Fischer, A., N. Span, M. Kuhn, M. Massimo and M. Butschek, 2007, Radarmessungen der Eisdicke Österreichischer Gletscher. Band II: Messungen 1999 bis 2006, *Österreichische Beiträge zu Meteorologie und Geophysik*, **39**. HS0042
- Förtsch, O., 1958, Ergebnisse seismischer Untersuchungen auf den Gletschern der Ostalpen, *Zeitschrift für Geophysik*, **24**, 161-167. HS0024
- Förtsch, O., and H. Vidal, 1958, Seismo-glaziologische Studien auf einem Gletscherfleck, *Zeitschrift für Gletscherkunde und Glazialgeologie*, **4**, 35-45. HS0022
- Förtsch, O., and H. Vidal, 1957, Die seismische Vermessung des Grossen Gurgler Ferners in den Öztaler Alpen im Spätsommer 1956, *Gerlands Beiträge zur Geophysik*, **67**, 1-30. HS0026
- Förtsch, O., and H. Vidal, 1956, Die Ergebnisse der seismische Messungen auf dem Hintereis Ferner in den Öztaler Alpen 1954, *Gerlands Beiträge zur Geophysik*, **65**, 45-70. HS0025
- Förtsch, O., H.J. Schneider and H. Vidal, 1955, Seismische Messungen auf dem Gepatsch- und Kesselwand Ferner in den Öztaler Alpen, *Gerlands Beiträge zur Geophysik*, **64**, 233-261. HS0023
- Gergan, J.T., D.P. Dobhal and R. Kaushik, 1999, Ground penetrating radar ice thickness measurements of Dokriani bamak (glacier), Garhwal Himalaya, *Current Science*, **77**(1), 169-174. HS0018
- Giese, P., 1963, Some results of seismic refraction work at the Gepatsch Glacier in the Ötztal Alps, *International Association of Scientific Hydrology*, **61**, 154-161. HS0027
- Glazovskij, A.F., T.N. Konstantinova, Yu.Ya. Macheret, M.Yu. Moskalevskij, L.I. Bobrova and L.V. Sankina, 1991, Tolshchina l'da i podlednyj rel'ef lednika Frit'ofa po dannym nazemnoj radiolokatsionnoj s'emki, *Materialy Glyatsiologicheskikh Issledovaniy*, **72**, 161-166. HS0016
- Hodge, 1979, HS0005
- Hyndman, R.D., 1965, Gravity measurements on the Devon Island Ice Cap and an adjoining glacier, *Journal of Glaciology*, **5**(40), 489-496. HS0039
- Jacobel, 1995, HS0006
- Ma, L.L., L.D. Tian, J.C. Pu and P.L. Wang, 2010, Recent area and volume change of Kangwure Glacier in the middle of Himalayas, *Chinese Science Bulletin*, **55**(20), 2088-2096. HS0046
- Ma, L.L., L.D. Tian, W. Yang and W. Tang, 2008, Measuring the depth of Gurenhekou Glacier in the south of the Tibetan Plateau using GPR and estimating its volume based on the outcomes, *Journal of Glaciology and Geocryology*, **30**(5), 783-788. HS0044
- Macheret, Yu.Ya., A.F. Glazovskij, J.A. Dowdeswell and M.R. Gorman, 1999, Ice cap volume change on Franz Josef Land during last 40 years, *Zeitschrift für Gletscherkunde und Glazialgeologie*, **35**(2), 103-116. HS0041
- Macheret, Yu.Ya., P.A. Cherkasov and L.I. Bobrova, 1988, Tolshchina i ob'em lednikov Dzhungarskogo Alatau po dannym aeroradiozondirovaniya, *Materialy Glyatsiologicheskikh Issledovaniy*, **62**, 60-71. HS0004

- Navarro, F.J., J. Otero, Yu.Ya. Macheret, E.V. Vasilenko, J.J. Lapazaran, A.P. Ahlstrøm and F. Machío, 2009, Radioglaciological studies on Hurd Peninsula glaciers, Livingston Island, Antarctica, *Annals of Glaciology*, **50**(51), 17-24. HS0012
- Navarro, F.J., A.F. Glazovskij, Yu. Ya. Macheret, E.V. Vasilenko, M.I. Corcuera and M.L. Cuadrado, 2005, Ice-volume changes (1936-1990) and structure of Aldegondabreen, Spitsbergen, *Annals of Glaciology*, **42**, 158-162. HS0010
- Nikitin, S.A., A.V. Vesnin, A.V. Osipov and N.V. Iglovskaya, 2000a, Rezul'taty radiozondirovaniya lednikov Tsentral'nogo Altaya (Severo-Chujskij i Yuzhno-Chujskij khrebty), *Materialy Glyatsiologicheskikh Issledovaniy*, **88**, 145-148. HS0008
- Nikitin, S.A., A.V. Osipov, A.V. Vesnin and N.V. Iglovskaya, 2000b, Raspredelenie zapasov l'da v Severo-Chujskom khrebte Tsentral'nogo Altaya po dannym radiolokatsionnogo zondirovaniya, *Materialy Glyatsiologicheskikh Issledovaniy*, **90**, 107-111. HS0011
- Paterson, W.S.B., and R.M. Koerner, 1974, Radio-echo sounding of four ice caps in Arctic Canada, *Arctic*, **27**(3), 225-233. HS0040
- Pattyn, F., C. Delcourt, D. Samyn, B. de Smedt and M. Nolan, 2009, Bed properties and hydrological conditions underneath McCall Glacier, Alaska, USA, *Annals of Glaciology*, **50**(51), 80-84. HS0013
- Prinz, R., A. Fischer, L. Nicholson, S. Gruber and G. Kaser, 2011, Rapid decline of the ice volume of tropical Lewis Glacier, Mount Kenya, during the last half century, *Geophysical Research Letters*, **38**, doi:10.1029/2011GL046717. submitted. HS0031
- Rippin, D.M., I. Willis, N. Arnold, A.Hodson, J. Moore, J. Kohler and H. Björnsson, 2003, Changes in geometry and subglacial drainage of Midre Lovénbreen, Svalbard, determined from digital elevation models, *Earth Surface Processes and Landforms*, **28**(3), 273-298. HS0037
- Span, N., A. Fischer, M. Kuhn, M. Massimo and M. Butschek, 2005, Radarmessungen der Eisdicke Österreichischer Gletscher. Band I: Messungen 1995 bis 1998, *Österreichische Beiträge zu Meteorologie und Geophysik*, **33**. HS0038
- Su, Z., L. Ding and C. Liu, 1984, Glacier thickness and its reserves calculation on Tianshan Mountains, *Xinjiang Geography*, **7**(2), 37-44. HS0009
- Thyssen, F., and J. Kohnen, 1968, Eisseismische Untersuchungen auf dem Schmiedingerkees, *Polarforschung*, **6**, 78-82. HS0021
- Wang, N.L., and J.C. Pu, 2009, Ice thickness, sounded by ground penetrating radar, on the Bayi Glacier in the Qilian Mountains, China, *Journal of Glaciology and Geocryology*, **31**(3), 431-435. HS0045
- Wu, L.H., Z.Q. Li, P.Y. Wang, H.L. Li and F.T. Wang, 2011, Sounding the Sigong River Glacier No.4 in Mt. Bogda area, the Tianshan Mountains by using ground penetrating radar and estimating the ice volume, *Journal of Glaciology and Geocryology*, **33**(2), 276-282. HS0043
- Zhuravlev, A.B., 1981, O zavisimosti mezhdu ploshchad'yu i ob'emom lednikov, *Materialy Glyatsiologicheskikh Issledovaniy*, **40**, 262-265. HS0005
- Zhuravlev, A.B., 1985, Korrelyatsionniy metod otsenki zapasov l'da v lednikakh, *Materialy Glyatsiologicheskikh Issledovaniy*, **52**, 241-249. HS0006
